# Supplementary material for: Four new two-photon absorbing imidazo[4,5-f]1,10-phenanthroline dye derivatives with different dipole moment orientation based on different groups: synthesis, optical characterization and bioimaging
Source: Royal Society of Chemistry journal article supplement (doi:10.1039/c2tc00175f), 2012-11-14
Supplement: c2tc00175f.pdf [file c2tc00175f.pdf]

# Supporting Information

## **Four new two-photon absorbing imidazo[4,5-f]1,10-phenanthroline derivatives dyes with different dipole moment orientation based on different group: Synthesis, optical characterization and bioimaging**

Zheng Zheng, Qiong Zhang, Zhipeng Yu, MingDi Yang, Hongping Zhou,\* Jieying Wu, and Yupeng Tian

College of Chemistry and Chemical Engineering, Anhui University and Key  
Laboratory of Functional Inorganic Materials Chemistry of Anhui Province, 230039  
Hefei, PR China

\*Corresponding author. Fax: +86-551-5107342; Tel: +86-551-5108151

*E-mail address:* [zhpzhp@263.net](mailto:zhpzhp@263.net).

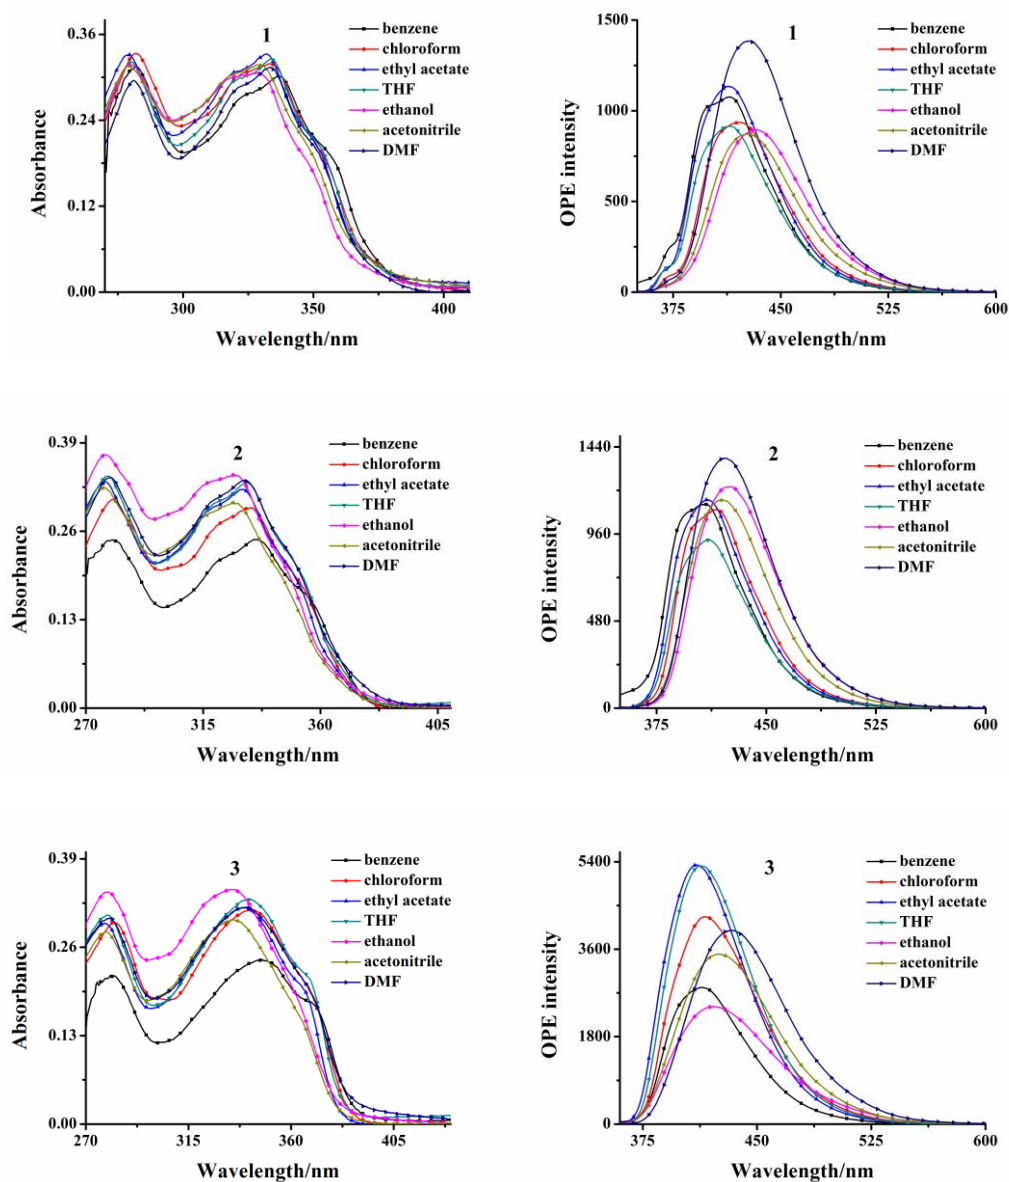

**Figure S1.** Linear absorption and fluorescence of dyes **1**, **2** and **3** in seven organic solvents of different polarities with a concentration of  $1 \times 10^{-5} \text{ mol L}^{-1}$ .

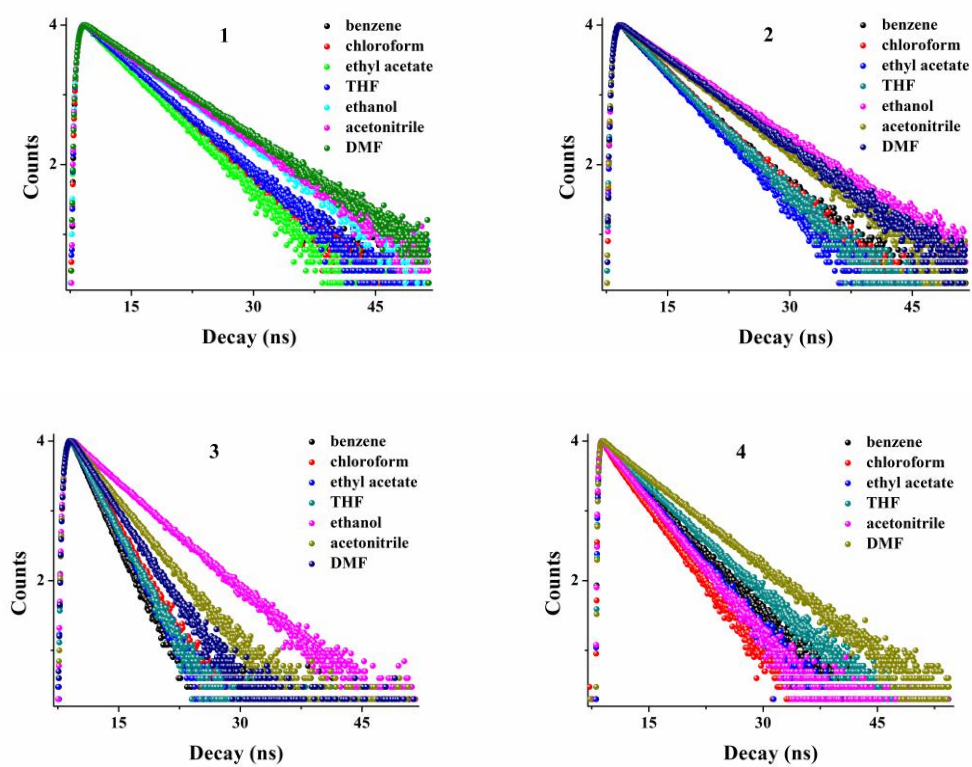

**Figure S2.** Time-resolved fluorescence curves of dyes **1-4** in seven solvents.
